# Supplementary material for: Poor correlation between large-scale environmental flow violations and freshwater biodiversity: implications for water resource management and the freshwater planetary boundary
Source: Copernicus journal article supplement (doi:10.5194/hess-26-6247-2022), 2022-12-13
Supplement: Supplementary file 1 [file hess-26-6247-2022-supplement.pdf]

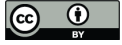

*Supplement of*

**Poor correlation between large-scale environmental flow violations and freshwater biodiversity: implications for water resource management and the freshwater planetary boundary**

**Chinchu Mohan et al.**

*Correspondence to:* Chinchu Mohan ([chinchu.mohan@usask.ca](mailto:chinchu.mohan@usask.ca)) and Tom Gleeson ([tgleeson@uvic.ca](mailto:tgleeson@uvic.ca))

The copyright of individual parts of the supplement might differ from the article licence.

# Supplementary Information

## S.1 Existing Assumption

Bunn and Arthington (2002) proposed four guiding principles to substantiate the influence of flow alterations on stream biodiversity: 1) The physical habitat is primarily determined by the flow, which in turn determines the biotic composition, 2) Flow variations directly influenced the evolution of aquatic species, 3) Viability of an aquatic population is determined by the longitudinal and lateral connectivity of the river systems, and 4) Alteration of flow regimes facilitates invasive, exotic species. These four principles and other basin-scale evidence (Leigh and Datry, 2017; Mathers et al., 2019; Sarremejane et al., 2020; Zeiringer et al., 2018) suggest that freshwater biodiversity has an inverse relationship with EF violations. According to this assumption, as the EF violation increases, the associated freshwater biodiversity will decrease. Furthermore, the EF-biodiversity relationship is assumed to be scale-independent, meaning that its nature does not change with spatial scale. A graphical representation of this assumption is given in Fig. S1. When the assumption is valid, a curve fitted against the freshwater biodiversity and EF violation should yield a negative gradient (Fig. S1 a) and the median value of biodiversity (either relative value or absolute value) of all violated basins should be significantly lower than the non-violated counterpart (Fig. S1 b). If either of these conditions are not met, then the assumption could be considered invalid.

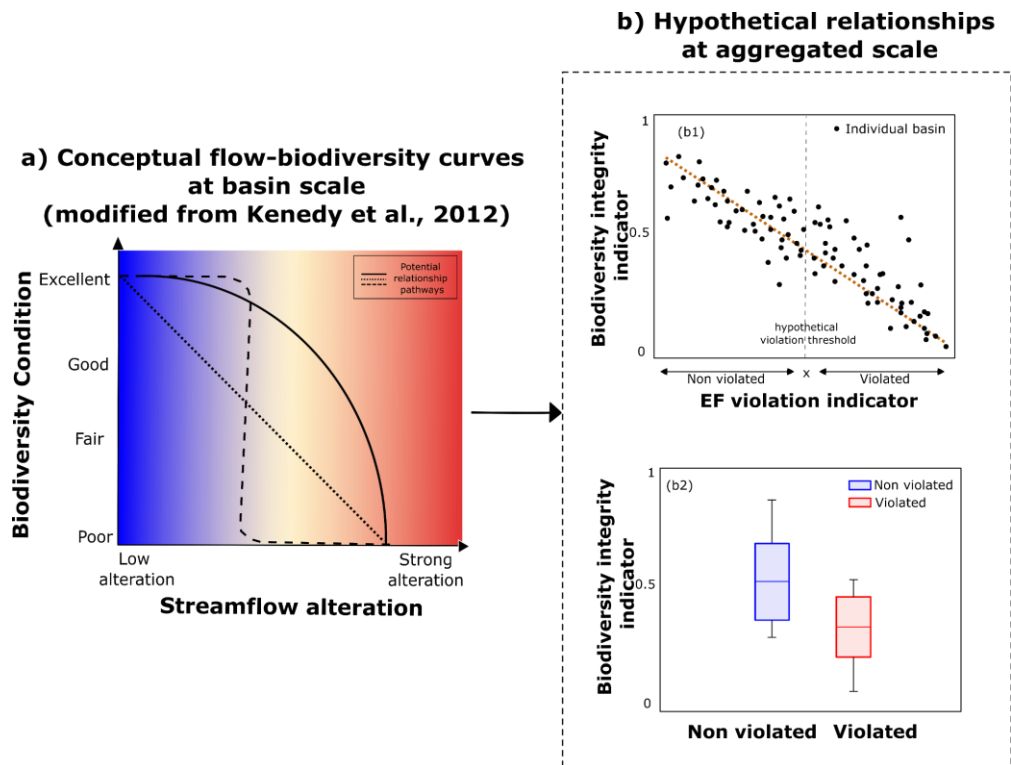

Fig. S1 a) Conceptual flow-biodiversity curves at basin scale modified from (Kendy et al., 2012) and b) hypothetical graphs of the simplest EF-biodiversity relationship (linear) at aggregated scale.

## S.2 Data requirement

We use the following global datasets in this study: Streamflow data, Environmental Flow Envelopes, Freshwater fish richness data, Freshwater fish facets, Subbasin boundaries. Each of the datasets selected are described and justified in Supplementary Table S1

Table S1: Data sources, description, and summary of all data used in this study

| Datasets                   | Description                                                                                                                                                                                                                                                        |
|----------------------------|--------------------------------------------------------------------------------------------------------------------------------------------------------------------------------------------------------------------------------------------------------------------|
| Aquatic fish richness data | <p><b>Data Source:</b> Tedesco et al. (2017)</p> <p><b>Temporal Resolution:</b> Temporal aggregate from data compiled from reports between 1960 and 2014</p> <p><b>Spatial Resolution (extend):</b> 30 arc second (3119 drainage basins; ~80% of Earth's land)</p> |

|                        |                                                                                                                                                                                                                                                                                                                                                                                                                                                                                                                                                                                                                                                                                                                                                                                                                                                                                                                                                                                                                                                                        |
|------------------------|------------------------------------------------------------------------------------------------------------------------------------------------------------------------------------------------------------------------------------------------------------------------------------------------------------------------------------------------------------------------------------------------------------------------------------------------------------------------------------------------------------------------------------------------------------------------------------------------------------------------------------------------------------------------------------------------------------------------------------------------------------------------------------------------------------------------------------------------------------------------------------------------------------------------------------------------------------------------------------------------------------------------------------------------------------------------|
|                        | <p><b>Description:</b> Fish richness data was compiled and processed from n 1436 published papers, books, grey literature and web-based sources published between 1960 and 2014.</p>                                                                                                                                                                                                                                                                                                                                                                                                                                                                                                                                                                                                                                                                                                                                                                                                                                                                                   |
| Freshwater fish facets | <p><b>Data Source:</b> Su et al. (2021)</p> <p><b>Temporal Resolution:</b> Representative of 2015</p> <p><b>Spatial Resolution (extend):</b> Basin scale (2465 drainage basins)</p> <p><b>Description:</b> Each facet indicates the change in the corresponding biodiversity component compared to the 18<sup>th</sup> century (roughly pre-industrial era). The taxonomic facets measure the occurrence of fish in a riverine system. Whereas functional facets are calculated using the morphological characteristics of each species that are linked to the feeding and locomotive functions which in turn relates to larger ecosystem functions like food web controlling and nutrition transport. On the other hand, the phylogenetic facets measure the total length of branches linking all species from the assemblage on the phylogenetic tree. The richness component of the three categories calculate the diversity among the assemblage whereas the dissimilarity accounts for the difference between each pair of fish assemblage in the same realm.</p> |
| RivFishTIME dataset    | <p><b>Data Source:</b> Comte et al., 2021</p> <p><b>Temporal Resolution:</b> Variable (1951 -2019)</p> <p><b>Spatial Resolution (extend):</b> Stream reach (11386 sampling location) (global)</p> <p><b>Description:</b> The database includes 11,386 time-series of riverine fish community catch data, including 646,270 species-specific abundance records together with metadata related to geographic location and sampling methodology of each time-series.</p>                                                                                                                                                                                                                                                                                                                                                                                                                                                                                                                                                                                                  |
| EFE                    | <p><b>Data Source:</b> Virkki et al. (2022)</p> <p><b>Temporal Resolution:</b> Monthly (Pre-industrial: 1801-1860)</p> <p><b>Spatial Resolution (extend):</b> Aggregated to Level 5 HydroBASIN (global)</p> <p><b>Description:</b> The EFE framework establishes an envelope of variability constrained by discharge limits beyond which flow in the streams may not meet the freshwater biodiversity needs</p>                                                                                                                                                                                                                                                                                                                                                                                                                                                                                                                                                                                                                                                        |
| Streamflow             | <p><b>Data Source:</b> ISIMIP (2020)</p> <p><b>Temporal Resolution:</b> Monthly (Pre-industrial: 1801-1860, Historical:</p>                                                                                                                                                                                                                                                                                                                                                                                                                                                                                                                                                                                                                                                                                                                                                                                                                                                                                                                                            |

|                      |                                                                                                                                                                                                                                                                                                                                                                                                                                                                                                                                                                                                                                                                                                                                                                                                           |
|----------------------|-----------------------------------------------------------------------------------------------------------------------------------------------------------------------------------------------------------------------------------------------------------------------------------------------------------------------------------------------------------------------------------------------------------------------------------------------------------------------------------------------------------------------------------------------------------------------------------------------------------------------------------------------------------------------------------------------------------------------------------------------------------------------------------------------------------|
|                      | <p>1976-2005)</p> <p><b>Spatial Resolution (extend):</b> Aggregated to Level 5 HydroBASIN (global)</p> <p><b>Description:</b> The streamflow data was obtained from Inter-Sectoral Impact Model Intercomparison Project (ISIMIP) simulation phase 2b outputs of global daily discharge (aggregated to monthly for this study); available at <a href="https://esg.pik-potsdam.de">https://esg.pik-potsdam.de</a>. ISIMIP is a community-driven climate-impact modelling initiative that offers a consistent framework for cross-sectoral, cross-scale modelling of the impacts of climate change. The streamflow was obtained for four Global Hydrological Models (GHM) (H08, Lpjml, PCR-GlobWB, WaterGap2) and four Global Circulation Models (GCM) (GFDL-EMS2M, HADGEM2-es, IPSL-CM5A-Ir, MICROC5) .</p> |
| Sub-basin boundaries | <p><b>Data Source:</b> HydroSHEDS (Lehner and Grill, 2013)</p> <p><b>Temporal Range:</b> NA</p> <p><b>Spatial Resolution (extend):</b> Level 5 HydroBASIN (global)</p> <p><b>Description:</b> HydroBASINs are the watershed boundaries derived from the hydrographic information from HydroSHED Database, developed with a goal of providing a global coverage of hierarchically nested sub-basins at various scales. The HydroBASIN catchment nesting follows the Pfafstetter coding system (Verdin and Verdin, 1999) and offers 12 levels (level 1 - course and level 12 - detailed) of sub-basin classification globally</p>                                                                                                                                                                           |

Table S2. Characteristics of biodiversity indicators

| Biodiversity indicator       | Relative measure | Gridded value | Biota data derived |
|------------------------------|------------------|---------------|--------------------|
| Fish Richness (FiR)          |                  | X             | X                  |
| Taxonomic Richness (TR)      | X                |               | X                  |
| Functional Richness (FR)     | X                |               | X                  |
| Phylogenetic Richness (PR)   | X                |               | X                  |
| Taxonomic Dissimilarity (TD) | X                |               | X                  |

|                                 |   |  |   |
|---------------------------------|---|--|---|
| Functional Dissimilarity (FD)   | X |  | X |
| Phylogenetic Dissimilarity (PD) | X |  | X |

### S.3 Environmental flow estimation methods and EFE violation ratio

This study uses five EF estimation methods

Table S3. Environmental flow estimation methods

| EF method                        | Flow regime classification                                                                                                                      | EFR calculation                                                                     | Other details                                                                                                          |
|----------------------------------|-------------------------------------------------------------------------------------------------------------------------------------------------|-------------------------------------------------------------------------------------|------------------------------------------------------------------------------------------------------------------------|
| Smakhtin (Smakhtin et al., 2004) | Highly variable flow regimes (Q90 < 10% MAF)<br>Intermediate variable flow (10% MAF Q90 < 20% MAF)<br>Low variable flow (20% MAF Q90 < 30% MAF) | High: Q90+ 0.2 . MAF<br><br>Intermediate: Q90+ 0.15. MAF<br><br>Low: Q90+ 0.07. MAF | <ul style="list-style-type: none"> <li>Stable EFRs throughout the year</li> <li>No inter annual variability</li> </ul> |
| Tennant (Tennant, 1976)          | High-flow season (MMF > MAF)<br>Low-flow season (MMF ≤ MAF)                                                                                     | High: 0.4 . MAF<br><br>Low: 0.2 . MAF                                               |                                                                                                                        |
| Q90-Q50 (Pastor et al., 2014)    | High-flow season (MMF > MAF)<br>Low-flow season (MMF ≤ MAF)                                                                                     | High: Q50<br><br>Low: Q90                                                           | <ul style="list-style-type: none"> <li>Based on annual flow quantiles</li> </ul>                                       |
| Tessmann (Tessmann, 1979)        | High (MMF > 40%MAF and 40% MMF > 40% MAF)<br>Intermediate (MMF > 40%MAF and 40% MMF = 40% MAF)                                                  | High: 0.4 . MMF<br><br>Intermediate: 0.4 . MMF                                      | <ul style="list-style-type: none"> <li>Consider inter annual variability</li> </ul>                                    |

|                                             |                                                                                                           |                                                                           |                                                                                                                                                             |
|---------------------------------------------|-----------------------------------------------------------------------------------------------------------|---------------------------------------------------------------------------|-------------------------------------------------------------------------------------------------------------------------------------------------------------|
|                                             | Low-flow months (MMF $\leq$ 40% of MAF)                                                                   | Low-flow months: 1. MMF                                                   |                                                                                                                                                             |
| Variable Monthly Flow (Pastor et al., 2014) | High (MMF > 80% of MAF)<br>Intermediate (MMF is 40–80% of MAF)<br>Low-flow months (MMF $\leq$ 40% of MAF) | High: 0.3 . MMF<br>Intermediate: 0.45 . MMF<br>Low-flow months: 0.6 . MMF | <ul style="list-style-type: none"> <li>• Consider inter annual variability</li> <li>• Can be aggregated and validated at basin and global scales</li> </ul> |

The magnitude of violation is based on the violation ratio proposed by Virkki et al. 2022.

Table S4 from Virkki et al., 2022. Computing the EFE violation ratio. Q stands for monthly discharge between 1976 and 2005;  $EFE_{lower}$  for the EFE lower bound, and  $EFE_{upper}$  for the EFE upper bound

| Condition                             | Violation ratio equation                                       | Violation ratio value    |
|---------------------------------------|----------------------------------------------------------------|--------------------------|
| $Q < EFE_{lower}$                     | $\frac{Q - EFE_{lower}}{EFE_{lower}} \times 100$               | < 0                      |
| $EFE_{lower} \leq Q \leq EFE_{upper}$ | $\frac{Q - EFE_{lower}}{EFE_{upper} - EFE_{lower}} \times 100$ | 0 -100<br>(no violation) |
| $Q > EFE_{upper}$                     | $(\frac{Q - EFE_{upper}}{EFE_{upper}} + 1) \times 100$         | >100                     |

#### S.4 Catchment classification based on flow variability

The catchments were classified based on the criteria provided by Smakhtin et al. (2004) The categorization criteria are given in Table S3.

Table S5. Criteria for different flow variability regime category

| Category                     | Criteria            | Characteristics                           |
|------------------------------|---------------------|-------------------------------------------|
| Highly variable flow regimes | $Q_{90} < 10\% MAF$ | receive most of the annual flow as floods |

|                                        |                           |                                                                                         |
|----------------------------------------|---------------------------|-----------------------------------------------------------------------------------------|
| Intermediate variable flow regimes     | $10\%MAF < Q90 < 20\%MAF$ | <Fill>                                                                                  |
| Low variable flow regimes              | $20\%MAF < Q90 < 30\%MAF$ | <Fill>                                                                                  |
| Stable catchments with high base flows | $Q90 > 30\%MAF$           | year round steady high baseflow; relatively less increase in flow during wetter periods |

Note: MAF = Mean Annual Flow

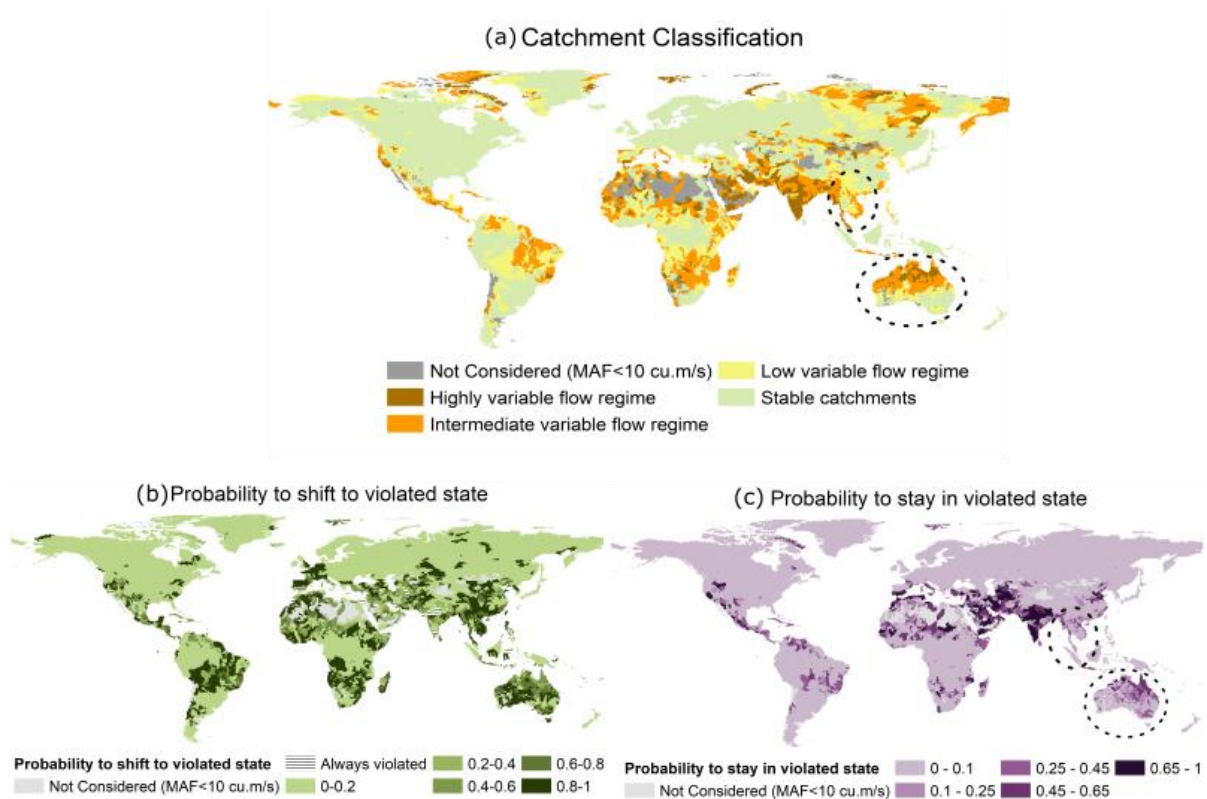

Fig. S2 (a) Catchment classification based on flow variability, EF violation maps for (b) P.shift and (c) P.stay with stable regions with high P.shift and low P.stay marked using dotted circle (eg. Australia)

## S.5 Aggregation methods



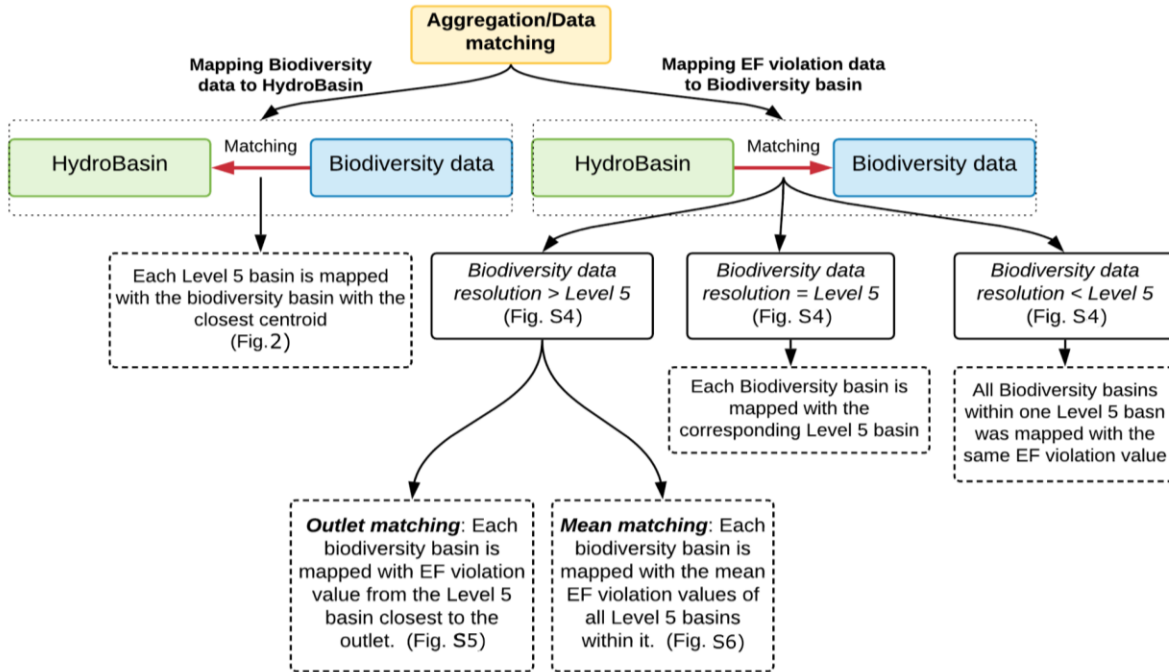

Fig. S3. Flow chart of various data mapping techniques used to match the spatial resolution of EF violation and biodiversity data.

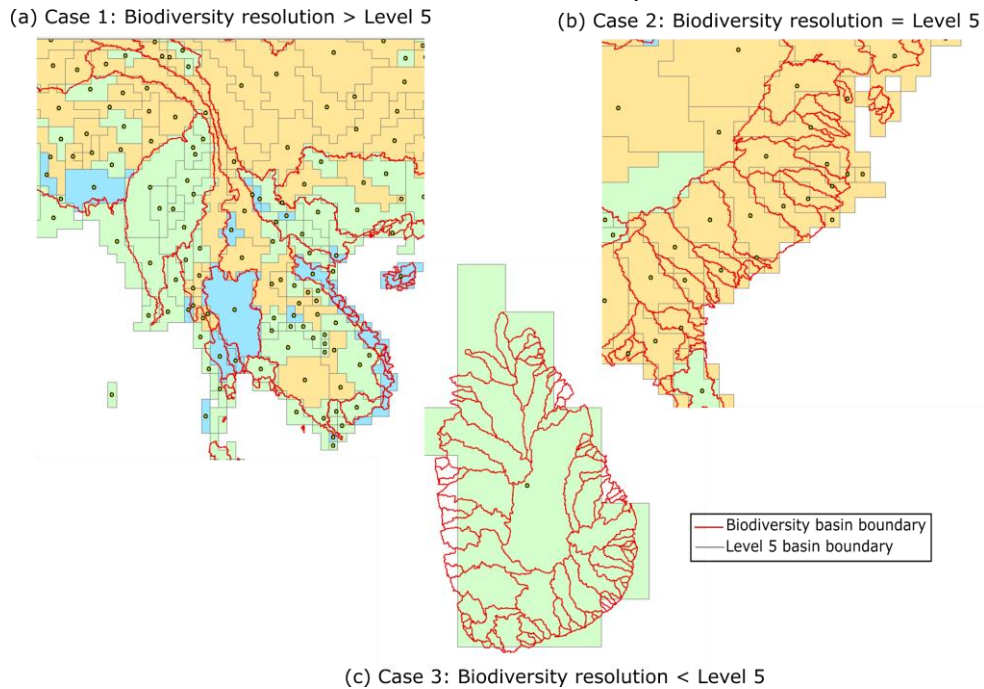

Fig. S4 (a-c) Spatial scale discrepancies between Level 5 HydroBASIN (EF violation) and biodiversity basin (Fish facets data)

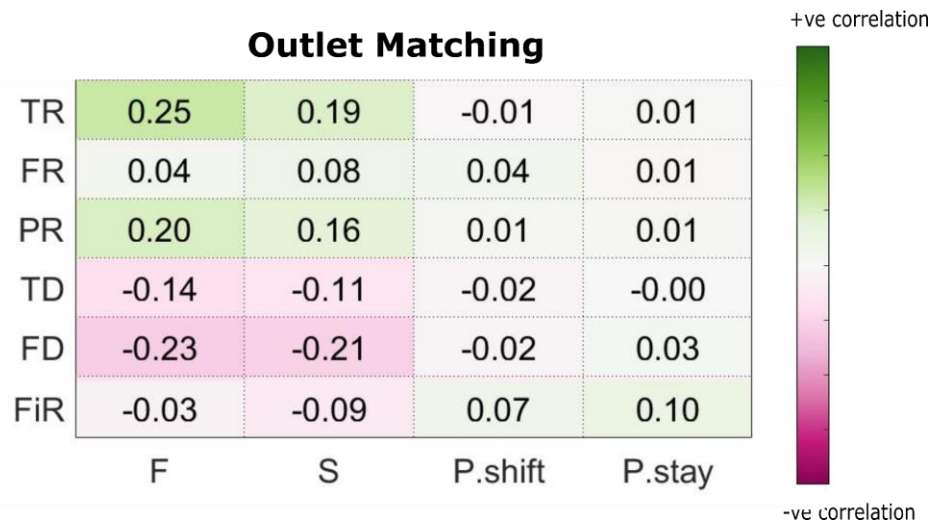

Fig. S5 R value of relationship between EF violation indices and Biodiversity indicators spatially matched using Outlet matching method

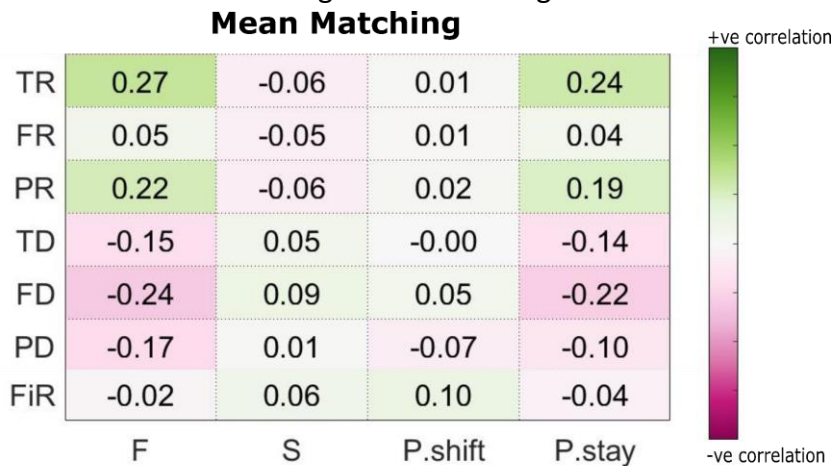

Fig. S6 R value of relationship between EF violation indices and Biodiversity indicators spatially matched using Mean matching method

## S.6 G200 biome classification

WWF's Global 200 project analyzed global patterns of biodiversity to identify a set of the Earth's terrestrial, freshwater, and marine ecoregions that harbor exceptional biodiversity and are representative of its ecosystems. This process yielded 238 ecoregions--the Global 200--comprising 142 terrestrial, 53 freshwater, and 43 marine priority ecoregions. In this study we used 7 main freshwater ecoregion categories which is a coarse aggregation of the 53 freshwater ecoregions identified in Global 200 project.

### S.7 Freshwater Major Habitat Types (MHT) classification

Freshwater Ecoregions of the World (FEOW), provides a new global biogeographic regionalization of the Earth's freshwater biodiversity, virtually all freshwater habitats on Earth (<https://databasin.org/datasets/0b6963be65074bca9306b1b6f05149d2/>). The FEOW are categorised based on the Major Habitat Type (MHT) to study the aquatic behavior in similar types of habitat (Fig. S7) (Abell et al., 2008).

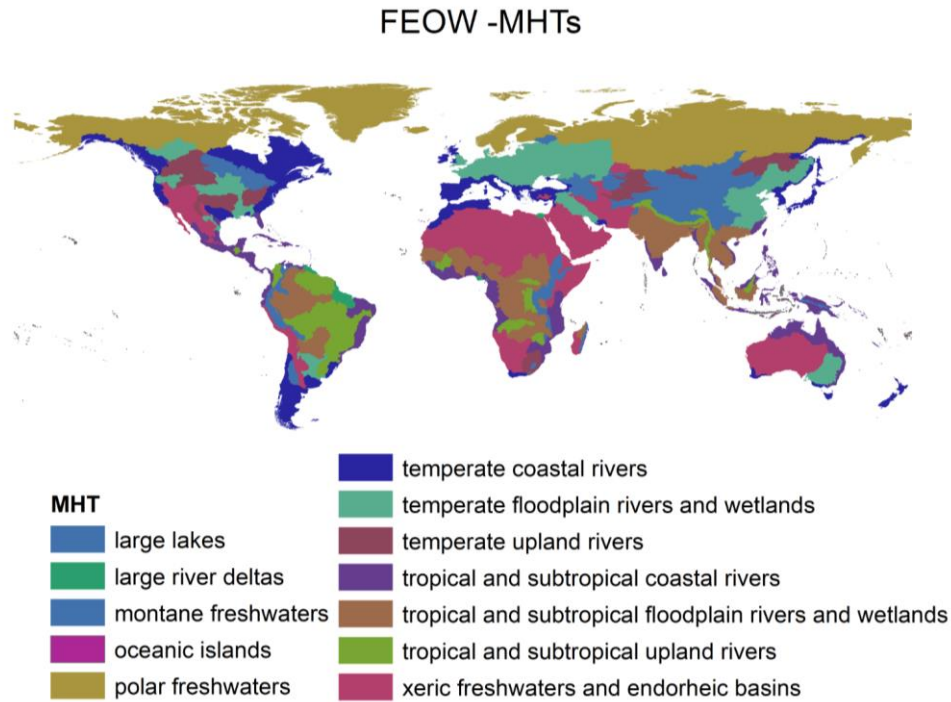

Fig. S7 Map of Major Habitat Types (freshwater)

Table S6. correlation between EF violation indices and freshwater biodiversity indicators for different freshwater MHT (N.B. \* marks the statistically significant relationships ( $p < 0.05$ ))

| Freshwater Major Habitat Type (MHT) | Correlation matrix | Total basin in MHT |
|-------------------------------------|--------------------|--------------------|
|-------------------------------------|--------------------|--------------------|

|                    |                                                                                                                                                                                                                                                                                                                                                                                                                                                                                                                                                                                                                                 |    |         |        |  |  |    |   |   |  |  |    |   |  |   |  |    |   |  |  |  |    |   |  |  |  |    |   |  |  |  |     |   |   |   |   |  |   |   |         |        |     |
|--------------------|---------------------------------------------------------------------------------------------------------------------------------------------------------------------------------------------------------------------------------------------------------------------------------------------------------------------------------------------------------------------------------------------------------------------------------------------------------------------------------------------------------------------------------------------------------------------------------------------------------------------------------|----|---------|--------|--|--|----|---|---|--|--|----|---|--|---|--|----|---|--|--|--|----|---|--|--|--|----|---|--|--|--|-----|---|---|---|---|--|---|---|---------|--------|-----|
| Large lakes        | <p style="text-align: center;">large lakes</p> <table border="1" style="margin-left: auto; margin-right: auto;"> <tr><td>TR</td><td></td><td></td><td></td><td></td></tr> <tr><td>FR</td><td>*</td><td></td><td></td><td></td></tr> <tr><td>PR</td><td></td><td></td><td>*</td><td></td></tr> <tr><td>TD</td><td>*</td><td></td><td></td><td></td></tr> <tr><td>FD</td><td>*</td><td></td><td></td><td></td></tr> <tr><td>PD</td><td>*</td><td></td><td></td><td></td></tr> <tr><td>FiR</td><td></td><td>*</td><td>*</td><td>*</td></tr> <tr><td></td><td>F</td><td>S</td><td>P.shift</td><td>P.stay</td></tr> </table>         | TR |         |        |  |  | FR | * |   |  |  | PR |   |  | * |  | TD | * |  |  |  | FD | * |  |  |  | PD | * |  |  |  | FiR |   | * | * | * |  | F | S | P.shift | P.stay | 109 |
| TR                 |                                                                                                                                                                                                                                                                                                                                                                                                                                                                                                                                                                                                                                 |    |         |        |  |  |    |   |   |  |  |    |   |  |   |  |    |   |  |  |  |    |   |  |  |  |    |   |  |  |  |     |   |   |   |   |  |   |   |         |        |     |
| FR                 | *                                                                                                                                                                                                                                                                                                                                                                                                                                                                                                                                                                                                                               |    |         |        |  |  |    |   |   |  |  |    |   |  |   |  |    |   |  |  |  |    |   |  |  |  |    |   |  |  |  |     |   |   |   |   |  |   |   |         |        |     |
| PR                 |                                                                                                                                                                                                                                                                                                                                                                                                                                                                                                                                                                                                                                 |    | *       |        |  |  |    |   |   |  |  |    |   |  |   |  |    |   |  |  |  |    |   |  |  |  |    |   |  |  |  |     |   |   |   |   |  |   |   |         |        |     |
| TD                 | *                                                                                                                                                                                                                                                                                                                                                                                                                                                                                                                                                                                                                               |    |         |        |  |  |    |   |   |  |  |    |   |  |   |  |    |   |  |  |  |    |   |  |  |  |    |   |  |  |  |     |   |   |   |   |  |   |   |         |        |     |
| FD                 | *                                                                                                                                                                                                                                                                                                                                                                                                                                                                                                                                                                                                                               |    |         |        |  |  |    |   |   |  |  |    |   |  |   |  |    |   |  |  |  |    |   |  |  |  |    |   |  |  |  |     |   |   |   |   |  |   |   |         |        |     |
| PD                 | *                                                                                                                                                                                                                                                                                                                                                                                                                                                                                                                                                                                                                               |    |         |        |  |  |    |   |   |  |  |    |   |  |   |  |    |   |  |  |  |    |   |  |  |  |    |   |  |  |  |     |   |   |   |   |  |   |   |         |        |     |
| FiR                |                                                                                                                                                                                                                                                                                                                                                                                                                                                                                                                                                                                                                                 | *  | *       | *      |  |  |    |   |   |  |  |    |   |  |   |  |    |   |  |  |  |    |   |  |  |  |    |   |  |  |  |     |   |   |   |   |  |   |   |         |        |     |
|                    | F                                                                                                                                                                                                                                                                                                                                                                                                                                                                                                                                                                                                                               | S  | P.shift | P.stay |  |  |    |   |   |  |  |    |   |  |   |  |    |   |  |  |  |    |   |  |  |  |    |   |  |  |  |     |   |   |   |   |  |   |   |         |        |     |
| Large river delta  | <p style="text-align: center;">large river deltas</p> <table border="1" style="margin-left: auto; margin-right: auto;"> <tr><td>TR</td><td></td><td></td><td></td><td></td></tr> <tr><td>FR</td><td></td><td></td><td></td><td></td></tr> <tr><td>PR</td><td></td><td></td><td></td><td></td></tr> <tr><td>TD</td><td></td><td></td><td></td><td></td></tr> <tr><td>FD</td><td></td><td></td><td></td><td></td></tr> <tr><td>PD</td><td></td><td></td><td></td><td></td></tr> <tr><td>FiR</td><td></td><td>*</td><td></td><td></td></tr> <tr><td></td><td>F</td><td>S</td><td>P.shift</td><td>P.stay</td></tr> </table>         | TR |         |        |  |  | FR |   |   |  |  | PR |   |  |   |  | TD |   |  |  |  | FD |   |  |  |  | PD |   |  |  |  | FiR |   | * |   |   |  | F | S | P.shift | P.stay | 28  |
| TR                 |                                                                                                                                                                                                                                                                                                                                                                                                                                                                                                                                                                                                                                 |    |         |        |  |  |    |   |   |  |  |    |   |  |   |  |    |   |  |  |  |    |   |  |  |  |    |   |  |  |  |     |   |   |   |   |  |   |   |         |        |     |
| FR                 |                                                                                                                                                                                                                                                                                                                                                                                                                                                                                                                                                                                                                                 |    |         |        |  |  |    |   |   |  |  |    |   |  |   |  |    |   |  |  |  |    |   |  |  |  |    |   |  |  |  |     |   |   |   |   |  |   |   |         |        |     |
| PR                 |                                                                                                                                                                                                                                                                                                                                                                                                                                                                                                                                                                                                                                 |    |         |        |  |  |    |   |   |  |  |    |   |  |   |  |    |   |  |  |  |    |   |  |  |  |    |   |  |  |  |     |   |   |   |   |  |   |   |         |        |     |
| TD                 |                                                                                                                                                                                                                                                                                                                                                                                                                                                                                                                                                                                                                                 |    |         |        |  |  |    |   |   |  |  |    |   |  |   |  |    |   |  |  |  |    |   |  |  |  |    |   |  |  |  |     |   |   |   |   |  |   |   |         |        |     |
| FD                 |                                                                                                                                                                                                                                                                                                                                                                                                                                                                                                                                                                                                                                 |    |         |        |  |  |    |   |   |  |  |    |   |  |   |  |    |   |  |  |  |    |   |  |  |  |    |   |  |  |  |     |   |   |   |   |  |   |   |         |        |     |
| PD                 |                                                                                                                                                                                                                                                                                                                                                                                                                                                                                                                                                                                                                                 |    |         |        |  |  |    |   |   |  |  |    |   |  |   |  |    |   |  |  |  |    |   |  |  |  |    |   |  |  |  |     |   |   |   |   |  |   |   |         |        |     |
| FiR                |                                                                                                                                                                                                                                                                                                                                                                                                                                                                                                                                                                                                                                 | *  |         |        |  |  |    |   |   |  |  |    |   |  |   |  |    |   |  |  |  |    |   |  |  |  |    |   |  |  |  |     |   |   |   |   |  |   |   |         |        |     |
|                    | F                                                                                                                                                                                                                                                                                                                                                                                                                                                                                                                                                                                                                               | S  | P.shift | P.stay |  |  |    |   |   |  |  |    |   |  |   |  |    |   |  |  |  |    |   |  |  |  |    |   |  |  |  |     |   |   |   |   |  |   |   |         |        |     |
| Montane freshwater | <p style="text-align: center;">montane freshwaters</p> <table border="1" style="margin-left: auto; margin-right: auto;"> <tr><td>TR</td><td>*</td><td></td><td></td><td></td></tr> <tr><td>FR</td><td>*</td><td>*</td><td></td><td></td></tr> <tr><td>PR</td><td>*</td><td></td><td></td><td></td></tr> <tr><td>TD</td><td>*</td><td></td><td></td><td></td></tr> <tr><td>FD</td><td>*</td><td></td><td></td><td></td></tr> <tr><td>PD</td><td>*</td><td></td><td></td><td></td></tr> <tr><td>FiR</td><td>*</td><td></td><td></td><td></td></tr> <tr><td></td><td>F</td><td>S</td><td>P.shift</td><td>P.stay</td></tr> </table> | TR | *       |        |  |  | FR | * | * |  |  | PR | * |  |   |  | TD | * |  |  |  | FD | * |  |  |  | PD | * |  |  |  | FiR | * |   |   |   |  | F | S | P.shift | P.stay | 264 |
| TR                 | *                                                                                                                                                                                                                                                                                                                                                                                                                                                                                                                                                                                                                               |    |         |        |  |  |    |   |   |  |  |    |   |  |   |  |    |   |  |  |  |    |   |  |  |  |    |   |  |  |  |     |   |   |   |   |  |   |   |         |        |     |
| FR                 | *                                                                                                                                                                                                                                                                                                                                                                                                                                                                                                                                                                                                                               | *  |         |        |  |  |    |   |   |  |  |    |   |  |   |  |    |   |  |  |  |    |   |  |  |  |    |   |  |  |  |     |   |   |   |   |  |   |   |         |        |     |
| PR                 | *                                                                                                                                                                                                                                                                                                                                                                                                                                                                                                                                                                                                                               |    |         |        |  |  |    |   |   |  |  |    |   |  |   |  |    |   |  |  |  |    |   |  |  |  |    |   |  |  |  |     |   |   |   |   |  |   |   |         |        |     |
| TD                 | *                                                                                                                                                                                                                                                                                                                                                                                                                                                                                                                                                                                                                               |    |         |        |  |  |    |   |   |  |  |    |   |  |   |  |    |   |  |  |  |    |   |  |  |  |    |   |  |  |  |     |   |   |   |   |  |   |   |         |        |     |
| FD                 | *                                                                                                                                                                                                                                                                                                                                                                                                                                                                                                                                                                                                                               |    |         |        |  |  |    |   |   |  |  |    |   |  |   |  |    |   |  |  |  |    |   |  |  |  |    |   |  |  |  |     |   |   |   |   |  |   |   |         |        |     |
| PD                 | *                                                                                                                                                                                                                                                                                                                                                                                                                                                                                                                                                                                                                               |    |         |        |  |  |    |   |   |  |  |    |   |  |   |  |    |   |  |  |  |    |   |  |  |  |    |   |  |  |  |     |   |   |   |   |  |   |   |         |        |     |
| FiR                | *                                                                                                                                                                                                                                                                                                                                                                                                                                                                                                                                                                                                                               |    |         |        |  |  |    |   |   |  |  |    |   |  |   |  |    |   |  |  |  |    |   |  |  |  |    |   |  |  |  |     |   |   |   |   |  |   |   |         |        |     |
|                    | F                                                                                                                                                                                                                                                                                                                                                                                                                                                                                                                                                                                                                               | S  | P.shift | P.stay |  |  |    |   |   |  |  |    |   |  |   |  |    |   |  |  |  |    |   |  |  |  |    |   |  |  |  |     |   |   |   |   |  |   |   |         |        |     |

|                                             |                                                                                                                                                                                                                                                                                                                                                                                                                                                                                                                                                                                                                                                                                                                                                                                                                                                                                                                                                                                                                                                                                                                                                                                                                                                                                                                                                                                                                                                                                                                                                                                                                                                                                                       |    |         |        |   |   |    |   |   |   |   |    |   |   |   |   |    |   |   |   |  |    |   |   |   |  |    |   |   |   |  |     |   |   |   |   |  |   |   |         |        |            |
|---------------------------------------------|-------------------------------------------------------------------------------------------------------------------------------------------------------------------------------------------------------------------------------------------------------------------------------------------------------------------------------------------------------------------------------------------------------------------------------------------------------------------------------------------------------------------------------------------------------------------------------------------------------------------------------------------------------------------------------------------------------------------------------------------------------------------------------------------------------------------------------------------------------------------------------------------------------------------------------------------------------------------------------------------------------------------------------------------------------------------------------------------------------------------------------------------------------------------------------------------------------------------------------------------------------------------------------------------------------------------------------------------------------------------------------------------------------------------------------------------------------------------------------------------------------------------------------------------------------------------------------------------------------------------------------------------------------------------------------------------------------|----|---------|--------|---|---|----|---|---|---|---|----|---|---|---|---|----|---|---|---|--|----|---|---|---|--|----|---|---|---|--|-----|---|---|---|---|--|---|---|---------|--------|------------|
| <p>Xeric freshwater and endorheic basin</p> | <p style="text-align: center;">xeric freshwaters and endorheic (closed) basins</p> <table border="1" style="width: 100%; text-align: center;"> <tr> <td>TR</td> <td style="background-color: #f080f0;">*</td> <td></td> <td style="background-color: #f080f0;">*</td> <td></td> </tr> <tr> <td>FR</td> <td style="background-color: #c1e1c1;">*</td> <td style="background-color: #c1e1c1;">*</td> <td style="background-color: #f080f0;">*</td> <td style="background-color: #c1e1c1;">*</td> </tr> <tr> <td>PR</td> <td style="background-color: #f080f0;">*</td> <td style="background-color: #f080f0;">*</td> <td style="background-color: #f080f0;">*</td> <td></td> </tr> <tr> <td>TD</td> <td style="background-color: #f080f0;">*</td> <td style="background-color: #f080f0;">*</td> <td style="background-color: #f080f0;">*</td> <td></td> </tr> <tr> <td>FD</td> <td style="background-color: #f080f0;">*</td> <td style="background-color: #f080f0;">*</td> <td style="background-color: #f080f0;">*</td> <td></td> </tr> <tr> <td>PD</td> <td style="background-color: #f080f0;">*</td> <td style="background-color: #f080f0;">*</td> <td style="background-color: #f080f0;">*</td> <td></td> </tr> <tr> <td>FiR</td> <td style="background-color: #f080f0;">*</td> <td style="background-color: #f080f0;">*</td> <td style="background-color: #f080f0;">*</td> <td style="background-color: #f080f0;">*</td> </tr> <tr> <td></td> <td>F</td> <td>S</td> <td>P.shift</td> <td>P.stay</td> </tr> </table>                                                                                                                                                                                 | TR | *       |        | * |   | FR | * | * | * | * | PR | * | * | * |   | TD | * | * | * |  | FD | * | * | * |  | PD | * | * | * |  | FiR | * | * | * | * |  | F | S | P.shift | P.stay | <p>864</p> |
| TR                                          | *                                                                                                                                                                                                                                                                                                                                                                                                                                                                                                                                                                                                                                                                                                                                                                                                                                                                                                                                                                                                                                                                                                                                                                                                                                                                                                                                                                                                                                                                                                                                                                                                                                                                                                     |    | *       |        |   |   |    |   |   |   |   |    |   |   |   |   |    |   |   |   |  |    |   |   |   |  |    |   |   |   |  |     |   |   |   |   |  |   |   |         |        |            |
| FR                                          | *                                                                                                                                                                                                                                                                                                                                                                                                                                                                                                                                                                                                                                                                                                                                                                                                                                                                                                                                                                                                                                                                                                                                                                                                                                                                                                                                                                                                                                                                                                                                                                                                                                                                                                     | *  | *       | *      |   |   |    |   |   |   |   |    |   |   |   |   |    |   |   |   |  |    |   |   |   |  |    |   |   |   |  |     |   |   |   |   |  |   |   |         |        |            |
| PR                                          | *                                                                                                                                                                                                                                                                                                                                                                                                                                                                                                                                                                                                                                                                                                                                                                                                                                                                                                                                                                                                                                                                                                                                                                                                                                                                                                                                                                                                                                                                                                                                                                                                                                                                                                     | *  | *       |        |   |   |    |   |   |   |   |    |   |   |   |   |    |   |   |   |  |    |   |   |   |  |    |   |   |   |  |     |   |   |   |   |  |   |   |         |        |            |
| TD                                          | *                                                                                                                                                                                                                                                                                                                                                                                                                                                                                                                                                                                                                                                                                                                                                                                                                                                                                                                                                                                                                                                                                                                                                                                                                                                                                                                                                                                                                                                                                                                                                                                                                                                                                                     | *  | *       |        |   |   |    |   |   |   |   |    |   |   |   |   |    |   |   |   |  |    |   |   |   |  |    |   |   |   |  |     |   |   |   |   |  |   |   |         |        |            |
| FD                                          | *                                                                                                                                                                                                                                                                                                                                                                                                                                                                                                                                                                                                                                                                                                                                                                                                                                                                                                                                                                                                                                                                                                                                                                                                                                                                                                                                                                                                                                                                                                                                                                                                                                                                                                     | *  | *       |        |   |   |    |   |   |   |   |    |   |   |   |   |    |   |   |   |  |    |   |   |   |  |    |   |   |   |  |     |   |   |   |   |  |   |   |         |        |            |
| PD                                          | *                                                                                                                                                                                                                                                                                                                                                                                                                                                                                                                                                                                                                                                                                                                                                                                                                                                                                                                                                                                                                                                                                                                                                                                                                                                                                                                                                                                                                                                                                                                                                                                                                                                                                                     | *  | *       |        |   |   |    |   |   |   |   |    |   |   |   |   |    |   |   |   |  |    |   |   |   |  |    |   |   |   |  |     |   |   |   |   |  |   |   |         |        |            |
| FiR                                         | *                                                                                                                                                                                                                                                                                                                                                                                                                                                                                                                                                                                                                                                                                                                                                                                                                                                                                                                                                                                                                                                                                                                                                                                                                                                                                                                                                                                                                                                                                                                                                                                                                                                                                                     | *  | *       | *      |   |   |    |   |   |   |   |    |   |   |   |   |    |   |   |   |  |    |   |   |   |  |    |   |   |   |  |     |   |   |   |   |  |   |   |         |        |            |
|                                             | F                                                                                                                                                                                                                                                                                                                                                                                                                                                                                                                                                                                                                                                                                                                                                                                                                                                                                                                                                                                                                                                                                                                                                                                                                                                                                                                                                                                                                                                                                                                                                                                                                                                                                                     | S  | P.shift | P.stay |   |   |    |   |   |   |   |    |   |   |   |   |    |   |   |   |  |    |   |   |   |  |    |   |   |   |  |     |   |   |   |   |  |   |   |         |        |            |
| <p>Temperate coastal rivers</p>             | <p style="text-align: center;">temperate coastal rivers</p> <table border="1" style="width: 100%; text-align: center;"> <tr> <td>TR</td> <td style="background-color: #90ee90;">*</td> <td style="background-color: #3cb371;">*</td> <td style="background-color: #c1e1c1;"></td> <td style="background-color: #90ee90;">*</td> </tr> <tr> <td>FR</td> <td style="background-color: #90ee90;">*</td> <td style="background-color: #c1e1c1;">*</td> <td style="background-color: #f0f0f0;"></td> <td style="background-color: #f0f0f0;"></td> </tr> <tr> <td>PR</td> <td style="background-color: #90ee90;">*</td> <td style="background-color: #3cb371;">*</td> <td style="background-color: #c1e1c1;"></td> <td style="background-color: #90ee90;">*</td> </tr> <tr> <td>TD</td> <td style="background-color: #f0f0f0;"></td> <td style="background-color: #c1e1c1;"></td> <td style="background-color: #f080f0;"></td> <td style="background-color: #c1e1c1;"></td> </tr> <tr> <td>FD</td> <td style="background-color: #f0f0f0;"></td> <td style="background-color: #c1e1c1;"></td> <td style="background-color: #f080f0;">*</td> <td style="background-color: #c1e1c1;"></td> </tr> <tr> <td>PD</td> <td style="background-color: #f0f0f0;"></td> <td style="background-color: #c1e1c1;"></td> <td style="background-color: #f080f0;"></td> <td style="background-color: #c1e1c1;"></td> </tr> <tr> <td>FiR</td> <td style="background-color: #90ee90;">*</td> <td style="background-color: #f080f0;">*</td> <td style="background-color: #f0f0f0;"></td> <td style="background-color: #f0f0f0;"></td> </tr> <tr> <td></td> <td>F</td> <td>S</td> <td>P.shift</td> <td>P.stay</td> </tr> </table> | TR | *       | *      |   | * | FR | * | * |   |   | PR | * | * |   | * | TD |   |   |   |  | FD |   |   | * |  | PD |   |   |   |  | FiR | * | * |   |   |  | F | S | P.shift | P.stay | <p>483</p> |
| TR                                          | *                                                                                                                                                                                                                                                                                                                                                                                                                                                                                                                                                                                                                                                                                                                                                                                                                                                                                                                                                                                                                                                                                                                                                                                                                                                                                                                                                                                                                                                                                                                                                                                                                                                                                                     | *  |         | *      |   |   |    |   |   |   |   |    |   |   |   |   |    |   |   |   |  |    |   |   |   |  |    |   |   |   |  |     |   |   |   |   |  |   |   |         |        |            |
| FR                                          | *                                                                                                                                                                                                                                                                                                                                                                                                                                                                                                                                                                                                                                                                                                                                                                                                                                                                                                                                                                                                                                                                                                                                                                                                                                                                                                                                                                                                                                                                                                                                                                                                                                                                                                     | *  |         |        |   |   |    |   |   |   |   |    |   |   |   |   |    |   |   |   |  |    |   |   |   |  |    |   |   |   |  |     |   |   |   |   |  |   |   |         |        |            |
| PR                                          | *                                                                                                                                                                                                                                                                                                                                                                                                                                                                                                                                                                                                                                                                                                                                                                                                                                                                                                                                                                                                                                                                                                                                                                                                                                                                                                                                                                                                                                                                                                                                                                                                                                                                                                     | *  |         | *      |   |   |    |   |   |   |   |    |   |   |   |   |    |   |   |   |  |    |   |   |   |  |    |   |   |   |  |     |   |   |   |   |  |   |   |         |        |            |
| TD                                          |                                                                                                                                                                                                                                                                                                                                                                                                                                                                                                                                                                                                                                                                                                                                                                                                                                                                                                                                                                                                                                                                                                                                                                                                                                                                                                                                                                                                                                                                                                                                                                                                                                                                                                       |    |         |        |   |   |    |   |   |   |   |    |   |   |   |   |    |   |   |   |  |    |   |   |   |  |    |   |   |   |  |     |   |   |   |   |  |   |   |         |        |            |
| FD                                          |                                                                                                                                                                                                                                                                                                                                                                                                                                                                                                                                                                                                                                                                                                                                                                                                                                                                                                                                                                                                                                                                                                                                                                                                                                                                                                                                                                                                                                                                                                                                                                                                                                                                                                       |    | *       |        |   |   |    |   |   |   |   |    |   |   |   |   |    |   |   |   |  |    |   |   |   |  |    |   |   |   |  |     |   |   |   |   |  |   |   |         |        |            |
| PD                                          |                                                                                                                                                                                                                                                                                                                                                                                                                                                                                                                                                                                                                                                                                                                                                                                                                                                                                                                                                                                                                                                                                                                                                                                                                                                                                                                                                                                                                                                                                                                                                                                                                                                                                                       |    |         |        |   |   |    |   |   |   |   |    |   |   |   |   |    |   |   |   |  |    |   |   |   |  |    |   |   |   |  |     |   |   |   |   |  |   |   |         |        |            |
| FiR                                         | *                                                                                                                                                                                                                                                                                                                                                                                                                                                                                                                                                                                                                                                                                                                                                                                                                                                                                                                                                                                                                                                                                                                                                                                                                                                                                                                                                                                                                                                                                                                                                                                                                                                                                                     | *  |         |        |   |   |    |   |   |   |   |    |   |   |   |   |    |   |   |   |  |    |   |   |   |  |    |   |   |   |  |     |   |   |   |   |  |   |   |         |        |            |
|                                             | F                                                                                                                                                                                                                                                                                                                                                                                                                                                                                                                                                                                                                                                                                                                                                                                                                                                                                                                                                                                                                                                                                                                                                                                                                                                                                                                                                                                                                                                                                                                                                                                                                                                                                                     | S  | P.shift | P.stay |   |   |    |   |   |   |   |    |   |   |   |   |    |   |   |   |  |    |   |   |   |  |    |   |   |   |  |     |   |   |   |   |  |   |   |         |        |            |
| <p>Temperate upland rivers</p>              | <p style="text-align: center;">temperate upland rivers</p> <table border="1" style="width: 100%; text-align: center;"> <tr> <td>TR</td> <td style="background-color: #c1e1c1;"></td> <td style="background-color: #c1e1c1;"></td> <td style="background-color: #c1e1c1;"></td> <td style="background-color: #c1e1c1;"></td> </tr> <tr> <td>FR</td> <td style="background-color: #c1e1c1;"></td> <td style="background-color: #c1e1c1;"></td> <td style="background-color: #c1e1c1;"></td> <td style="background-color: #c1e1c1;"></td> </tr> <tr> <td>PR</td> <td style="background-color: #f0f0f0;"></td> <td style="background-color: #c1e1c1;"></td> <td style="background-color: #c1e1c1;"></td> <td style="background-color: #c1e1c1;"></td> </tr> <tr> <td>TD</td> <td style="background-color: #f0f0f0;"></td> <td style="background-color: #c1e1c1;"></td> <td style="background-color: #f080f0;"></td> <td style="background-color: #c1e1c1;"></td> </tr> <tr> <td>FD</td> <td style="background-color: #f0f0f0;"></td> <td style="background-color: #c1e1c1;"></td> <td style="background-color: #f080f0;">*</td> <td style="background-color: #c1e1c1;"></td> </tr> <tr> <td>PD</td> <td style="background-color: #f0f0f0;"></td> <td style="background-color: #c1e1c1;"></td> <td style="background-color: #f080f0;"></td> <td style="background-color: #c1e1c1;"></td> </tr> <tr> <td>FiR</td> <td style="background-color: #f080f0;">*</td> <td style="background-color: #f080f0;">*</td> <td style="background-color: #f0f0f0;"></td> <td style="background-color: #f080f0;">*</td> </tr> <tr> <td></td> <td>F</td> <td>S</td> <td>P.shift</td> <td>P.stay</td> </tr> </table>         | TR |         |        |   |   | FR |   |   |   |   | PR |   |   |   |   | TD |   |   |   |  | FD |   |   | * |  | PD |   |   |   |  | FiR | * | * |   | * |  | F | S | P.shift | P.stay | <p>180</p> |
| TR                                          |                                                                                                                                                                                                                                                                                                                                                                                                                                                                                                                                                                                                                                                                                                                                                                                                                                                                                                                                                                                                                                                                                                                                                                                                                                                                                                                                                                                                                                                                                                                                                                                                                                                                                                       |    |         |        |   |   |    |   |   |   |   |    |   |   |   |   |    |   |   |   |  |    |   |   |   |  |    |   |   |   |  |     |   |   |   |   |  |   |   |         |        |            |
| FR                                          |                                                                                                                                                                                                                                                                                                                                                                                                                                                                                                                                                                                                                                                                                                                                                                                                                                                                                                                                                                                                                                                                                                                                                                                                                                                                                                                                                                                                                                                                                                                                                                                                                                                                                                       |    |         |        |   |   |    |   |   |   |   |    |   |   |   |   |    |   |   |   |  |    |   |   |   |  |    |   |   |   |  |     |   |   |   |   |  |   |   |         |        |            |
| PR                                          |                                                                                                                                                                                                                                                                                                                                                                                                                                                                                                                                                                                                                                                                                                                                                                                                                                                                                                                                                                                                                                                                                                                                                                                                                                                                                                                                                                                                                                                                                                                                                                                                                                                                                                       |    |         |        |   |   |    |   |   |   |   |    |   |   |   |   |    |   |   |   |  |    |   |   |   |  |    |   |   |   |  |     |   |   |   |   |  |   |   |         |        |            |
| TD                                          |                                                                                                                                                                                                                                                                                                                                                                                                                                                                                                                                                                                                                                                                                                                                                                                                                                                                                                                                                                                                                                                                                                                                                                                                                                                                                                                                                                                                                                                                                                                                                                                                                                                                                                       |    |         |        |   |   |    |   |   |   |   |    |   |   |   |   |    |   |   |   |  |    |   |   |   |  |    |   |   |   |  |     |   |   |   |   |  |   |   |         |        |            |
| FD                                          |                                                                                                                                                                                                                                                                                                                                                                                                                                                                                                                                                                                                                                                                                                                                                                                                                                                                                                                                                                                                                                                                                                                                                                                                                                                                                                                                                                                                                                                                                                                                                                                                                                                                                                       |    | *       |        |   |   |    |   |   |   |   |    |   |   |   |   |    |   |   |   |  |    |   |   |   |  |    |   |   |   |  |     |   |   |   |   |  |   |   |         |        |            |
| PD                                          |                                                                                                                                                                                                                                                                                                                                                                                                                                                                                                                                                                                                                                                                                                                                                                                                                                                                                                                                                                                                                                                                                                                                                                                                                                                                                                                                                                                                                                                                                                                                                                                                                                                                                                       |    |         |        |   |   |    |   |   |   |   |    |   |   |   |   |    |   |   |   |  |    |   |   |   |  |    |   |   |   |  |     |   |   |   |   |  |   |   |         |        |            |
| FiR                                         | *                                                                                                                                                                                                                                                                                                                                                                                                                                                                                                                                                                                                                                                                                                                                                                                                                                                                                                                                                                                                                                                                                                                                                                                                                                                                                                                                                                                                                                                                                                                                                                                                                                                                                                     | *  |         | *      |   |   |    |   |   |   |   |    |   |   |   |   |    |   |   |   |  |    |   |   |   |  |    |   |   |   |  |     |   |   |   |   |  |   |   |         |        |            |
|                                             | F                                                                                                                                                                                                                                                                                                                                                                                                                                                                                                                                                                                                                                                                                                                                                                                                                                                                                                                                                                                                                                                                                                                                                                                                                                                                                                                                                                                                                                                                                                                                                                                                                                                                                                     | S  | P.shift | P.stay |   |   |    |   |   |   |   |    |   |   |   |   |    |   |   |   |  |    |   |   |   |  |    |   |   |   |  |     |   |   |   |   |  |   |   |         |        |            |

|                                                |                                                                                                                                                                                                                                                                                                                                                                                                                                                                                                                                                                                                                                                                                                                                                                                                                                                                                                                                                                                                                                                                                                                                                                                                                                                                                                                                      |    |         |        |   |   |    |   |   |   |   |    |  |   |  |   |    |   |   |  |  |    |   |   |  |  |    |   |   |  |  |     |   |   |   |   |     |   |   |         |        |            |   |   |         |        |            |
|------------------------------------------------|--------------------------------------------------------------------------------------------------------------------------------------------------------------------------------------------------------------------------------------------------------------------------------------------------------------------------------------------------------------------------------------------------------------------------------------------------------------------------------------------------------------------------------------------------------------------------------------------------------------------------------------------------------------------------------------------------------------------------------------------------------------------------------------------------------------------------------------------------------------------------------------------------------------------------------------------------------------------------------------------------------------------------------------------------------------------------------------------------------------------------------------------------------------------------------------------------------------------------------------------------------------------------------------------------------------------------------------|----|---------|--------|---|---|----|---|---|---|---|----|--|---|--|---|----|---|---|--|--|----|---|---|--|--|----|---|---|--|--|-----|---|---|---|---|-----|---|---|---------|--------|------------|---|---|---------|--------|------------|
| <p>Temperate floodplain river and wetlands</p> | <p style="text-align: center;">temperate floodplain rivers and wetlands</p> <table border="1" style="width: 100%; border-collapse: collapse;"> <tr> <td style="width: 15%;">TR</td> <td style="width: 20%;"></td> <td style="width: 20%;"></td> <td style="width: 20%; text-align: center;">*</td> <td style="width: 25%; text-align: center;">*</td> </tr> <tr> <td>FR</td> <td style="text-align: center;">*</td> <td style="text-align: center;">*</td> <td style="text-align: center;">*</td> <td style="text-align: center;">*</td> </tr> <tr> <td>PR</td> <td></td> <td></td> <td></td> <td style="text-align: center;">*</td> </tr> <tr> <td>TD</td> <td style="text-align: center;">*</td> <td></td> <td></td> <td></td> </tr> <tr> <td>FD</td> <td style="text-align: center;">*</td> <td></td> <td></td> <td></td> </tr> <tr> <td>PD</td> <td style="text-align: center;">*</td> <td></td> <td></td> <td></td> </tr> <tr> <td>FiR</td> <td style="text-align: center;">*</td> <td></td> <td></td> <td></td> </tr> <tr> <td></td> <td style="text-align: center;">F</td> <td style="text-align: center;">S</td> <td style="text-align: center;">P.shift</td> <td style="text-align: center;">P.stay</td> </tr> </table>                                                                                                     | TR |         |        | * | * | FR | * | * | * | * | PR |  |   |  | * | TD | * |   |  |  | FD | * |   |  |  | PD | * |   |  |  | FiR | * |   |   |   |     | F | S | P.shift | P.stay | <p>538</p> |   |   |         |        |            |
| TR                                             |                                                                                                                                                                                                                                                                                                                                                                                                                                                                                                                                                                                                                                                                                                                                                                                                                                                                                                                                                                                                                                                                                                                                                                                                                                                                                                                                      |    | *       | *      |   |   |    |   |   |   |   |    |  |   |  |   |    |   |   |  |  |    |   |   |  |  |    |   |   |  |  |     |   |   |   |   |     |   |   |         |        |            |   |   |         |        |            |
| FR                                             | *                                                                                                                                                                                                                                                                                                                                                                                                                                                                                                                                                                                                                                                                                                                                                                                                                                                                                                                                                                                                                                                                                                                                                                                                                                                                                                                                    | *  | *       | *      |   |   |    |   |   |   |   |    |  |   |  |   |    |   |   |  |  |    |   |   |  |  |    |   |   |  |  |     |   |   |   |   |     |   |   |         |        |            |   |   |         |        |            |
| PR                                             |                                                                                                                                                                                                                                                                                                                                                                                                                                                                                                                                                                                                                                                                                                                                                                                                                                                                                                                                                                                                                                                                                                                                                                                                                                                                                                                                      |    |         | *      |   |   |    |   |   |   |   |    |  |   |  |   |    |   |   |  |  |    |   |   |  |  |    |   |   |  |  |     |   |   |   |   |     |   |   |         |        |            |   |   |         |        |            |
| TD                                             | *                                                                                                                                                                                                                                                                                                                                                                                                                                                                                                                                                                                                                                                                                                                                                                                                                                                                                                                                                                                                                                                                                                                                                                                                                                                                                                                                    |    |         |        |   |   |    |   |   |   |   |    |  |   |  |   |    |   |   |  |  |    |   |   |  |  |    |   |   |  |  |     |   |   |   |   |     |   |   |         |        |            |   |   |         |        |            |
| FD                                             | *                                                                                                                                                                                                                                                                                                                                                                                                                                                                                                                                                                                                                                                                                                                                                                                                                                                                                                                                                                                                                                                                                                                                                                                                                                                                                                                                    |    |         |        |   |   |    |   |   |   |   |    |  |   |  |   |    |   |   |  |  |    |   |   |  |  |    |   |   |  |  |     |   |   |   |   |     |   |   |         |        |            |   |   |         |        |            |
| PD                                             | *                                                                                                                                                                                                                                                                                                                                                                                                                                                                                                                                                                                                                                                                                                                                                                                                                                                                                                                                                                                                                                                                                                                                                                                                                                                                                                                                    |    |         |        |   |   |    |   |   |   |   |    |  |   |  |   |    |   |   |  |  |    |   |   |  |  |    |   |   |  |  |     |   |   |   |   |     |   |   |         |        |            |   |   |         |        |            |
| FiR                                            | *                                                                                                                                                                                                                                                                                                                                                                                                                                                                                                                                                                                                                                                                                                                                                                                                                                                                                                                                                                                                                                                                                                                                                                                                                                                                                                                                    |    |         |        |   |   |    |   |   |   |   |    |  |   |  |   |    |   |   |  |  |    |   |   |  |  |    |   |   |  |  |     |   |   |   |   |     |   |   |         |        |            |   |   |         |        |            |
|                                                | F                                                                                                                                                                                                                                                                                                                                                                                                                                                                                                                                                                                                                                                                                                                                                                                                                                                                                                                                                                                                                                                                                                                                                                                                                                                                                                                                    | S  | P.shift | P.stay |   |   |    |   |   |   |   |    |  |   |  |   |    |   |   |  |  |    |   |   |  |  |    |   |   |  |  |     |   |   |   |   |     |   |   |         |        |            |   |   |         |        |            |
| <p>Tropical and subtropical coastal rivers</p> | <p style="text-align: center;">tropical and subtropical coastal rivers</p> <table border="1" style="width: 100%; border-collapse: collapse;"> <tr> <td style="width: 15%;">TR</td> <td style="width: 20%;"></td> <td style="width: 20%; text-align: center;">*</td> <td style="width: 20%;"></td> <td style="width: 25%;"></td> </tr> <tr> <td>FR</td> <td></td> <td></td> <td></td> <td></td> </tr> <tr> <td>PR</td> <td></td> <td style="text-align: center;">*</td> <td></td> <td></td> </tr> <tr> <td>TD</td> <td></td> <td style="text-align: center;">*</td> <td></td> <td></td> </tr> <tr> <td>FD</td> <td></td> <td style="text-align: center;">*</td> <td></td> <td></td> </tr> <tr> <td>PD</td> <td></td> <td style="text-align: center;">*</td> <td></td> <td></td> </tr> <tr> <td>AmR</td> <td style="text-align: center;">*</td> <td style="text-align: center;">*</td> <td style="text-align: center;">*</td> <td style="text-align: center;">*</td> </tr> <tr> <td>FiR</td> <td style="text-align: center;">*</td> <td style="text-align: center;">*</td> <td></td> <td style="text-align: center;">*</td> </tr> <tr> <td></td> <td style="text-align: center;">F</td> <td style="text-align: center;">S</td> <td style="text-align: center;">P.shift</td> <td style="text-align: center;">P.stay</td> </tr> </table> | TR |         | *      |   |   | FR |   |   |   |   | PR |  | * |  |   | TD |   | * |  |  | FD |   | * |  |  | PD |   | * |  |  | AmR | * | * | * | * | FiR | * | * |         | *      |            | F | S | P.shift | P.stay | <p>428</p> |
| TR                                             |                                                                                                                                                                                                                                                                                                                                                                                                                                                                                                                                                                                                                                                                                                                                                                                                                                                                                                                                                                                                                                                                                                                                                                                                                                                                                                                                      | *  |         |        |   |   |    |   |   |   |   |    |  |   |  |   |    |   |   |  |  |    |   |   |  |  |    |   |   |  |  |     |   |   |   |   |     |   |   |         |        |            |   |   |         |        |            |
| FR                                             |                                                                                                                                                                                                                                                                                                                                                                                                                                                                                                                                                                                                                                                                                                                                                                                                                                                                                                                                                                                                                                                                                                                                                                                                                                                                                                                                      |    |         |        |   |   |    |   |   |   |   |    |  |   |  |   |    |   |   |  |  |    |   |   |  |  |    |   |   |  |  |     |   |   |   |   |     |   |   |         |        |            |   |   |         |        |            |
| PR                                             |                                                                                                                                                                                                                                                                                                                                                                                                                                                                                                                                                                                                                                                                                                                                                                                                                                                                                                                                                                                                                                                                                                                                                                                                                                                                                                                                      | *  |         |        |   |   |    |   |   |   |   |    |  |   |  |   |    |   |   |  |  |    |   |   |  |  |    |   |   |  |  |     |   |   |   |   |     |   |   |         |        |            |   |   |         |        |            |
| TD                                             |                                                                                                                                                                                                                                                                                                                                                                                                                                                                                                                                                                                                                                                                                                                                                                                                                                                                                                                                                                                                                                                                                                                                                                                                                                                                                                                                      | *  |         |        |   |   |    |   |   |   |   |    |  |   |  |   |    |   |   |  |  |    |   |   |  |  |    |   |   |  |  |     |   |   |   |   |     |   |   |         |        |            |   |   |         |        |            |
| FD                                             |                                                                                                                                                                                                                                                                                                                                                                                                                                                                                                                                                                                                                                                                                                                                                                                                                                                                                                                                                                                                                                                                                                                                                                                                                                                                                                                                      | *  |         |        |   |   |    |   |   |   |   |    |  |   |  |   |    |   |   |  |  |    |   |   |  |  |    |   |   |  |  |     |   |   |   |   |     |   |   |         |        |            |   |   |         |        |            |
| PD                                             |                                                                                                                                                                                                                                                                                                                                                                                                                                                                                                                                                                                                                                                                                                                                                                                                                                                                                                                                                                                                                                                                                                                                                                                                                                                                                                                                      | *  |         |        |   |   |    |   |   |   |   |    |  |   |  |   |    |   |   |  |  |    |   |   |  |  |    |   |   |  |  |     |   |   |   |   |     |   |   |         |        |            |   |   |         |        |            |
| AmR                                            | *                                                                                                                                                                                                                                                                                                                                                                                                                                                                                                                                                                                                                                                                                                                                                                                                                                                                                                                                                                                                                                                                                                                                                                                                                                                                                                                                    | *  | *       | *      |   |   |    |   |   |   |   |    |  |   |  |   |    |   |   |  |  |    |   |   |  |  |    |   |   |  |  |     |   |   |   |   |     |   |   |         |        |            |   |   |         |        |            |
| FiR                                            | *                                                                                                                                                                                                                                                                                                                                                                                                                                                                                                                                                                                                                                                                                                                                                                                                                                                                                                                                                                                                                                                                                                                                                                                                                                                                                                                                    | *  |         | *      |   |   |    |   |   |   |   |    |  |   |  |   |    |   |   |  |  |    |   |   |  |  |    |   |   |  |  |     |   |   |   |   |     |   |   |         |        |            |   |   |         |        |            |
|                                                | F                                                                                                                                                                                                                                                                                                                                                                                                                                                                                                                                                                                                                                                                                                                                                                                                                                                                                                                                                                                                                                                                                                                                                                                                                                                                                                                                    | S  | P.shift | P.stay |   |   |    |   |   |   |   |    |  |   |  |   |    |   |   |  |  |    |   |   |  |  |    |   |   |  |  |     |   |   |   |   |     |   |   |         |        |            |   |   |         |        |            |
| <p>Tropical and subtropical upland rivers</p>  | <p style="text-align: center;">tropical and subtropical coastal rivers</p> <table border="1" style="width: 100%; border-collapse: collapse;"> <tr> <td style="width: 15%;">TR</td> <td style="width: 20%;"></td> <td style="width: 20%; text-align: center;">*</td> <td style="width: 20%;"></td> <td style="width: 25%;"></td> </tr> <tr> <td>FR</td> <td></td> <td></td> <td></td> <td></td> </tr> <tr> <td>PR</td> <td></td> <td style="text-align: center;">*</td> <td></td> <td></td> </tr> <tr> <td>TD</td> <td></td> <td style="text-align: center;">*</td> <td></td> <td></td> </tr> <tr> <td>FD</td> <td></td> <td style="text-align: center;">*</td> <td></td> <td></td> </tr> <tr> <td>PD</td> <td></td> <td style="text-align: center;">*</td> <td></td> <td></td> </tr> <tr> <td>FiR</td> <td style="text-align: center;">*</td> <td style="text-align: center;">*</td> <td></td> <td style="text-align: center;">*</td> </tr> <tr> <td></td> <td style="text-align: center;">F</td> <td style="text-align: center;">S</td> <td style="text-align: center;">P.shift</td> <td style="text-align: center;">P.stay</td> </tr> </table>                                                                                                                                                                                     | TR |         | *      |   |   | FR |   |   |   |   | PR |  | * |  |   | TD |   | * |  |  | FD |   | * |  |  | PD |   | * |  |  | FiR | * | * |   | * |     | F | S | P.shift | P.stay | <p>223</p> |   |   |         |        |            |
| TR                                             |                                                                                                                                                                                                                                                                                                                                                                                                                                                                                                                                                                                                                                                                                                                                                                                                                                                                                                                                                                                                                                                                                                                                                                                                                                                                                                                                      | *  |         |        |   |   |    |   |   |   |   |    |  |   |  |   |    |   |   |  |  |    |   |   |  |  |    |   |   |  |  |     |   |   |   |   |     |   |   |         |        |            |   |   |         |        |            |
| FR                                             |                                                                                                                                                                                                                                                                                                                                                                                                                                                                                                                                                                                                                                                                                                                                                                                                                                                                                                                                                                                                                                                                                                                                                                                                                                                                                                                                      |    |         |        |   |   |    |   |   |   |   |    |  |   |  |   |    |   |   |  |  |    |   |   |  |  |    |   |   |  |  |     |   |   |   |   |     |   |   |         |        |            |   |   |         |        |            |
| PR                                             |                                                                                                                                                                                                                                                                                                                                                                                                                                                                                                                                                                                                                                                                                                                                                                                                                                                                                                                                                                                                                                                                                                                                                                                                                                                                                                                                      | *  |         |        |   |   |    |   |   |   |   |    |  |   |  |   |    |   |   |  |  |    |   |   |  |  |    |   |   |  |  |     |   |   |   |   |     |   |   |         |        |            |   |   |         |        |            |
| TD                                             |                                                                                                                                                                                                                                                                                                                                                                                                                                                                                                                                                                                                                                                                                                                                                                                                                                                                                                                                                                                                                                                                                                                                                                                                                                                                                                                                      | *  |         |        |   |   |    |   |   |   |   |    |  |   |  |   |    |   |   |  |  |    |   |   |  |  |    |   |   |  |  |     |   |   |   |   |     |   |   |         |        |            |   |   |         |        |            |
| FD                                             |                                                                                                                                                                                                                                                                                                                                                                                                                                                                                                                                                                                                                                                                                                                                                                                                                                                                                                                                                                                                                                                                                                                                                                                                                                                                                                                                      | *  |         |        |   |   |    |   |   |   |   |    |  |   |  |   |    |   |   |  |  |    |   |   |  |  |    |   |   |  |  |     |   |   |   |   |     |   |   |         |        |            |   |   |         |        |            |
| PD                                             |                                                                                                                                                                                                                                                                                                                                                                                                                                                                                                                                                                                                                                                                                                                                                                                                                                                                                                                                                                                                                                                                                                                                                                                                                                                                                                                                      | *  |         |        |   |   |    |   |   |   |   |    |  |   |  |   |    |   |   |  |  |    |   |   |  |  |    |   |   |  |  |     |   |   |   |   |     |   |   |         |        |            |   |   |         |        |            |
| FiR                                            | *                                                                                                                                                                                                                                                                                                                                                                                                                                                                                                                                                                                                                                                                                                                                                                                                                                                                                                                                                                                                                                                                                                                                                                                                                                                                                                                                    | *  |         | *      |   |   |    |   |   |   |   |    |  |   |  |   |    |   |   |  |  |    |   |   |  |  |    |   |   |  |  |     |   |   |   |   |     |   |   |         |        |            |   |   |         |        |            |
|                                                | F                                                                                                                                                                                                                                                                                                                                                                                                                                                                                                                                                                                                                                                                                                                                                                                                                                                                                                                                                                                                                                                                                                                                                                                                                                                                                                                                    | S  | P.shift | P.stay |   |   |    |   |   |   |   |    |  |   |  |   |    |   |   |  |  |    |   |   |  |  |    |   |   |  |  |     |   |   |   |   |     |   |   |         |        |            |   |   |         |        |            |

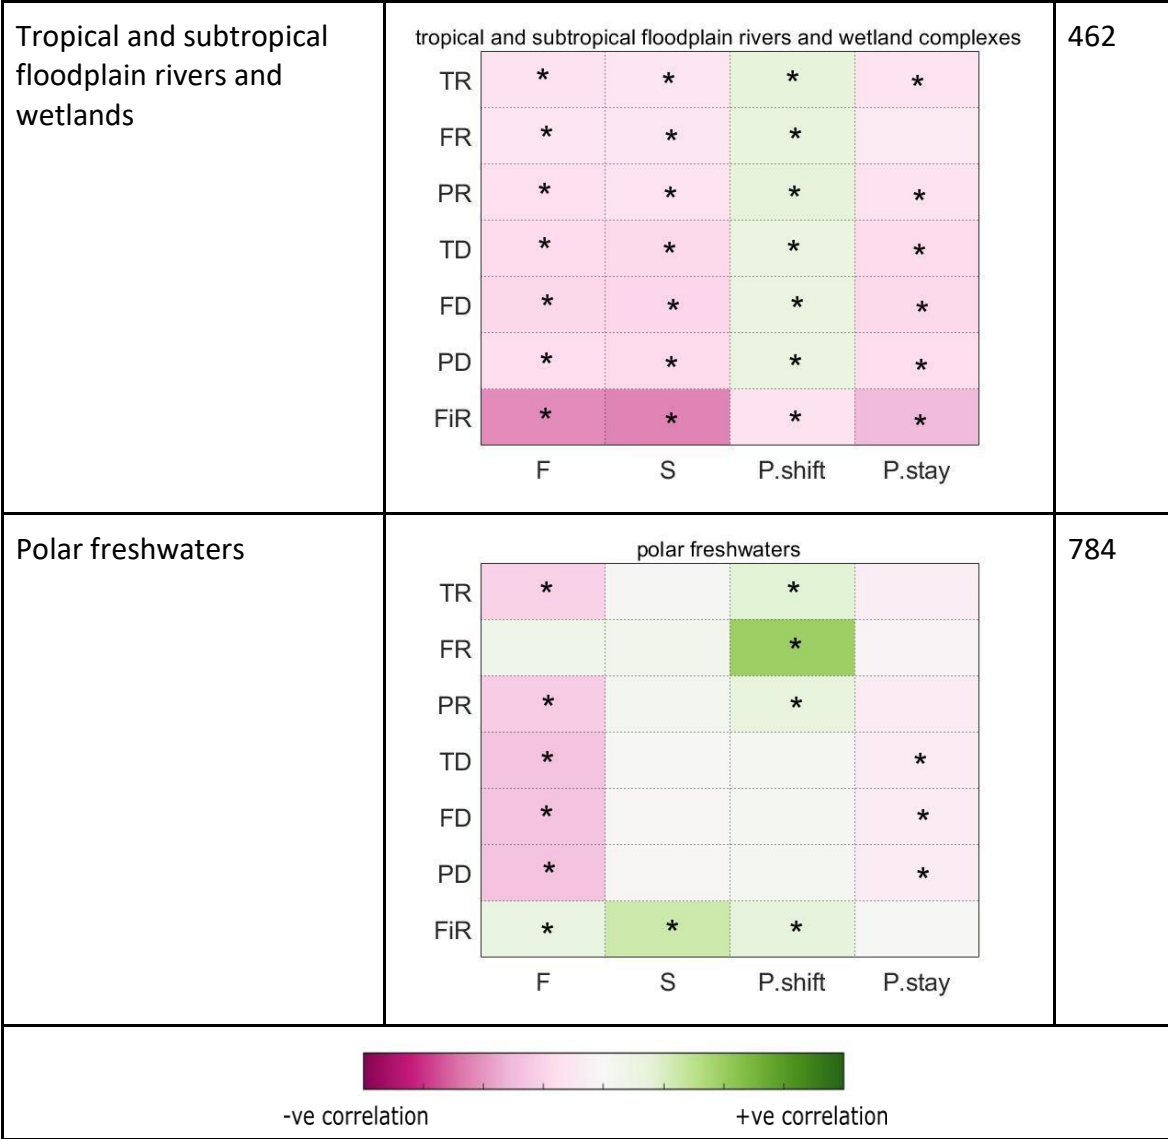

**S.8 Analysis using RivFishTIME dataset**

**Fish species / Data location**

**EFE-Frequency**

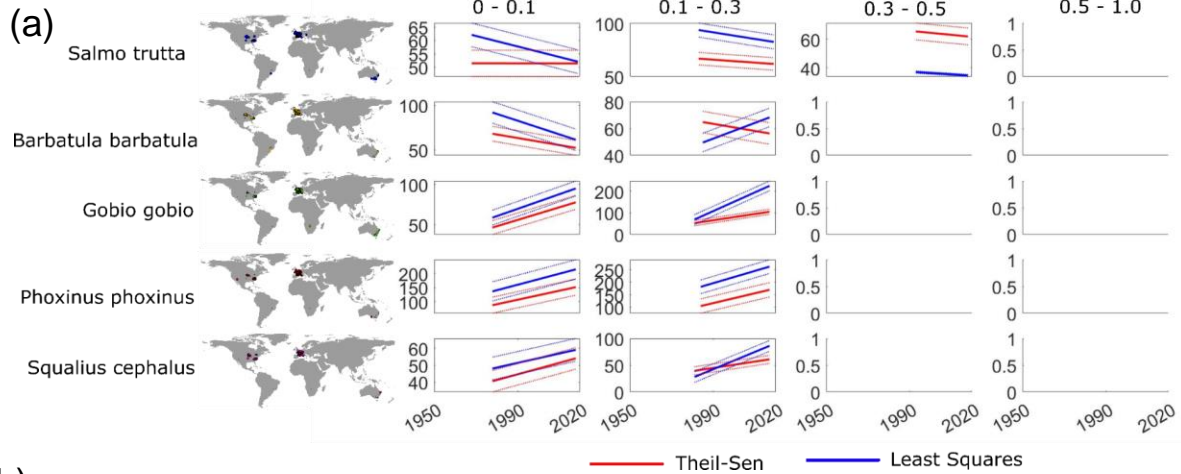

(b) **Fish species / Data location**

**EFE-Severity**

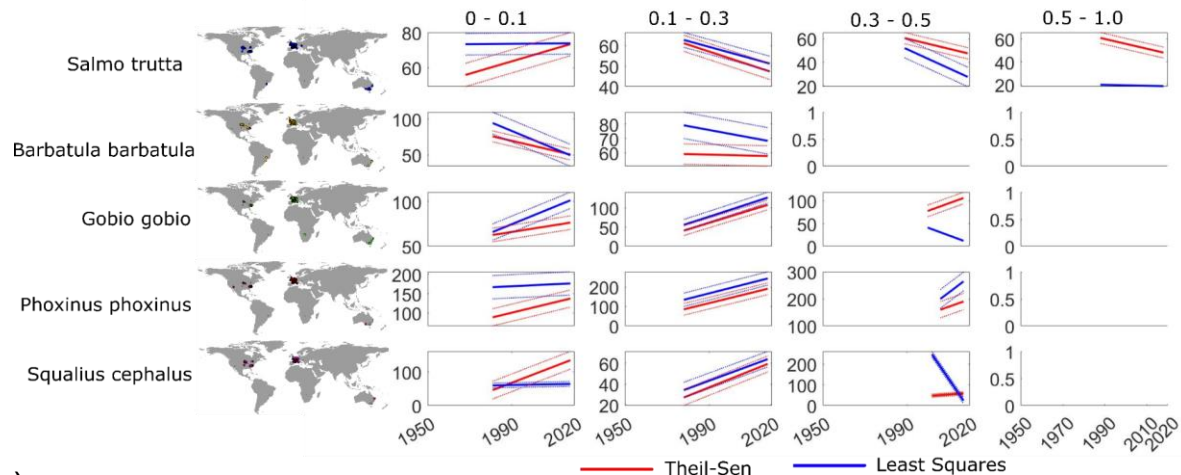

(c) **Fish species / Data location**

**EFE-P.shift**

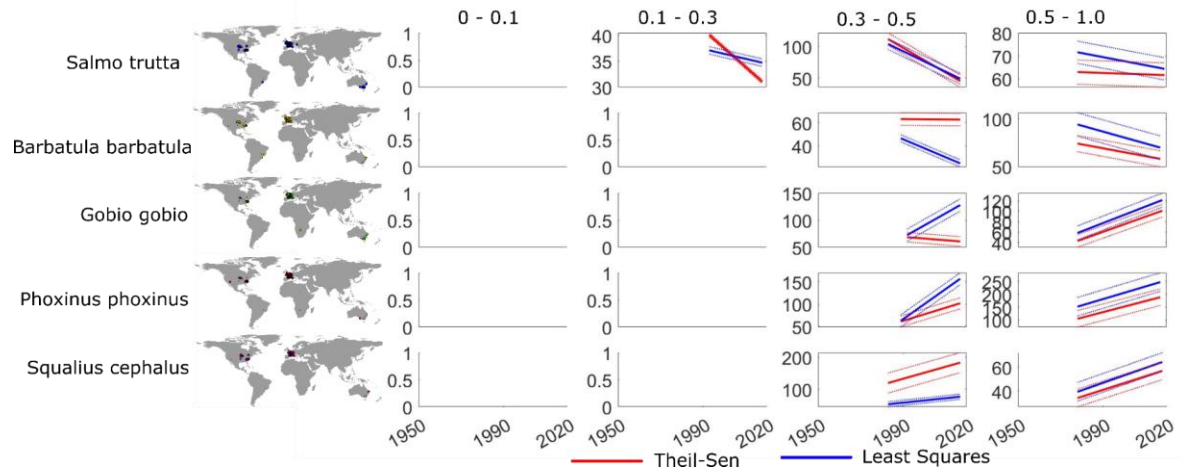



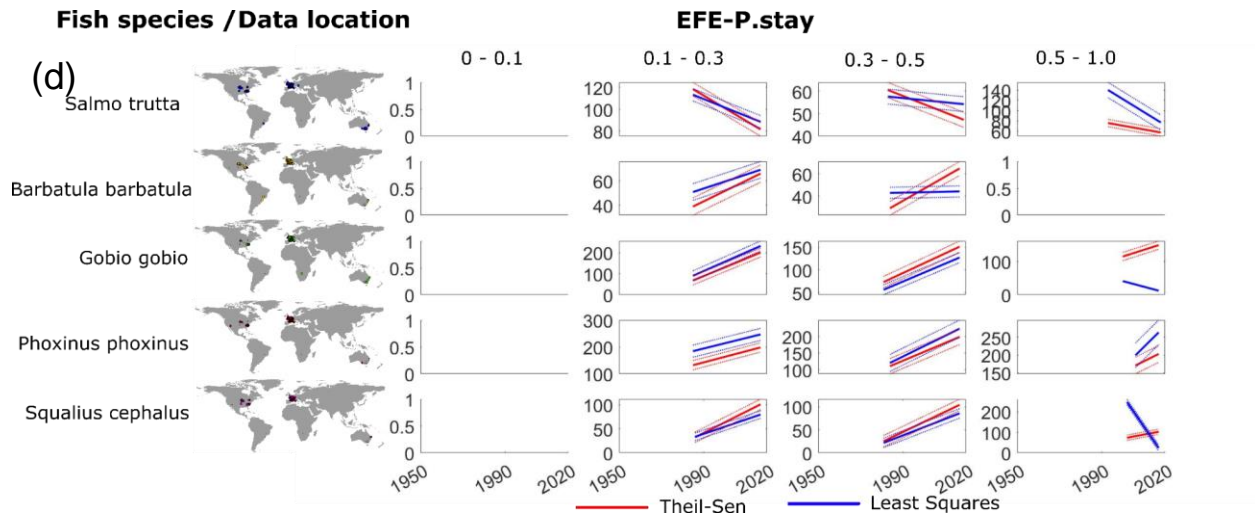

Fig. S8 Directional change in the abundance in 5 freshwater species categorized by different levels of EF violation indices; (a) F, (b) S, (c) P.shift and (d) P.stay.

Note: The dotted lines around the solid line represent the spread in different basins in each category

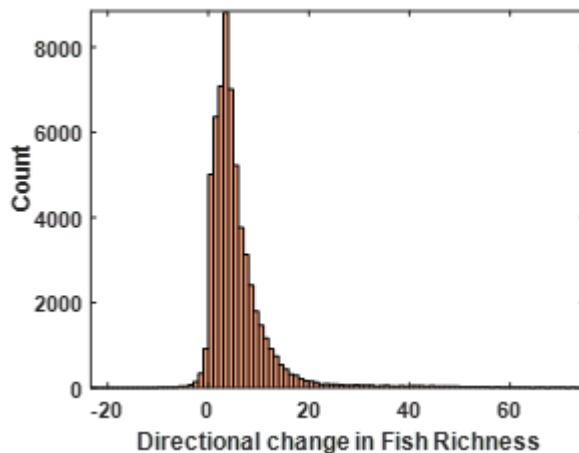

Fig. S9 Histogram of directional change in all the time series in RivFishTIME dataset. 97% of the fish time series are showing an increasing trend over time

RivFishTIME dataset was compiled from long-term riverine fish surveys from 46 regional and national monitoring programmes and from individual academic research efforts (Comte et al., 2021). The database includes 646,270 species-specific abundance time series covering 704 fish species. The data were collected from 11386 sites spanning over 19 countries (Fig. S9)

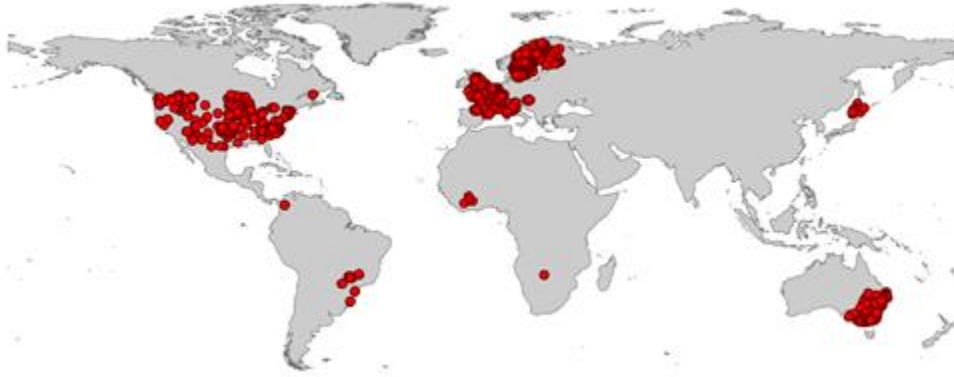

Fig. S10 Data locations of RivFishTIME dataset

### S.9 Multi variable regression analysis results - G200

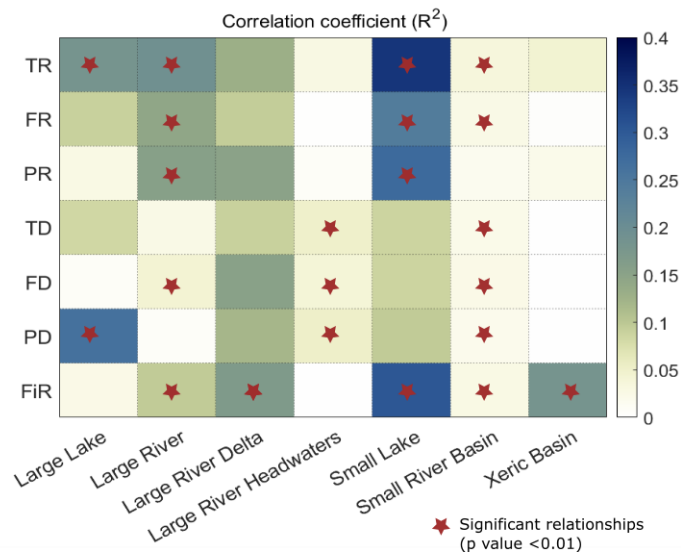

Fig. S11 Coefficient of correlation ( $r^2$ ) for multivariate regression. Each row represents on biodiversity indicator and each column represents one G200 ecoregion

### S.10 Variance in EF violation indicators within Su et al. data catchment boundary

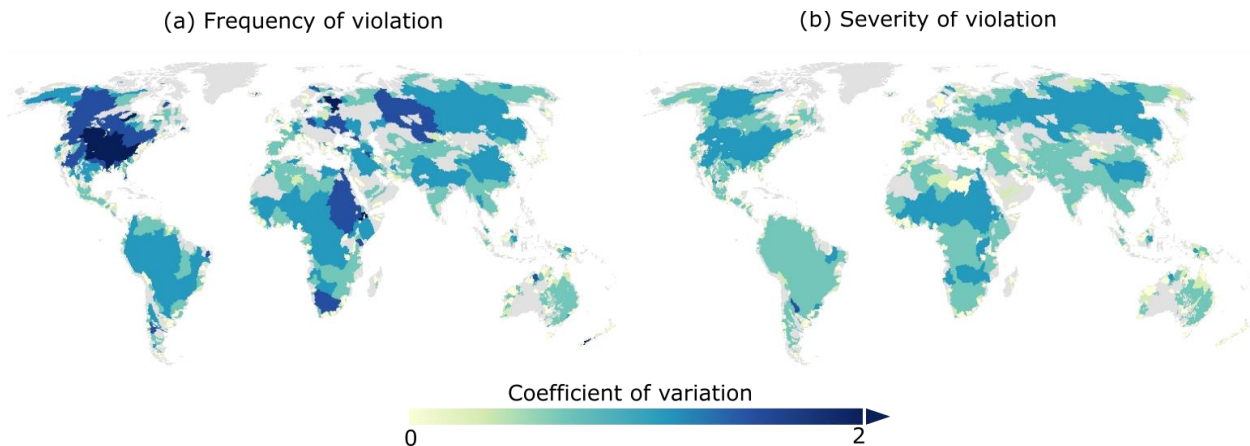

Fig. S12 EF violation indicators' coefficient of variance within fish facets data catchment boundary (Su et al., 2021): EF violation (a) frequency and (b) severity

### Reference

Abell, R., Thieme, M. L., Revenga, C., Bryer, M., Kottelat, M., Bogutskaya, N., Coad, B., Mandrak, N., Balderas, S. C., Bussing, W., Stiassny, M. L. J., Skelton, P., Allen, G. R., Unmack, P., Naseka, A., Ng, R., Sindorf, N., Robertson, J., Armijo, E., Higgins, J. V., Heibel, T. J., Wikramanayake, E., Olson, D., López, H. L., Reis, R. E., Lundberg, J. G., Sabaj Pérez, M. H., and Petry, P.: Freshwater Ecoregions of the World: A New Map of Biogeographic Units for Freshwater Biodiversity Conservation, *BioScience*, 58, 403–414, <https://doi.org/10.1641/B580507>, 2008.

Bunn, S. E. and Arthington, A. H.: Basic Principles and Ecological Consequences of Altered Flow Regimes for Aquatic Biodiversity, *Environmental Management*, 30, 492–507, <https://doi.org/10.1007/s00267-002-2737-0>, 2002.

Comte, L., Carvajal-Quintero, J., Tedesco, P. A., Giam, X., Brose, U., Erős, T., Filipe, A. F., Fortin, M.-J., Irving, K., Jacquet, C., Larsen, S., Sharma, S., Ruhi, A., Becker, F. G., Casatti, L., Castaldelli, G., Dala-Corte, R. B., Davenport, S. R., Franssen, N. R., García-Berthou, E., Gavioli, A., Gido, K. B., Jimenez-Segura, L., Leitão, R. P., McLarney, B., Meador, J., Milardi, M., Moffatt, D. B., Occhi, T. V. T., Pompeu, P. S., Propst, D. L., Pyron, M., Salvador, G. N., Stefferud, J. A., Sutela, T., Taylor, C., Terui, A., Urabe, H., Vehanen, T., Vitule, J. R. S., Zeni, J. O., and Olden, J. D.: RivFishTIME: A global database of fish time-series to study global change ecology in riverine systems, *Global Ecology and Biogeography*, 30, 38–50, <https://doi.org/10.1111/geb.13210>, 2021.

The Inter-Sectoral Impact Model Intercomparison Project: <https://www.isimip.org/>, last access: 28 February 2020.

Kendy, E., Apse, C., and Blann, K.: A practical guide to environmental flows for policy and planning, *Nat Conserv*, 2012.

Lehner, B. and Grill, G.: Global river hydrography and network routing: baseline data and new approaches to study the world's large river systems, *Hydrological Processes*, 27, 2171–2186,

2013.

Leigh, C. and Datry, T.: Drying as a primary hydrological determinant of biodiversity in river systems: A broad-scale analysis, *Ecography*, 40(4), 487–499, 2017.

Mathers, K. L., Stubbington, R., Leeming, D., Westwood, C., and England, J.: Structural and functional responses of macroinvertebrate assemblages to long-term flow variability at perennial and nonperennial sites, *Ecohydrology*, 12, e2112, 2019.

Pastor, A. V., Ludwig, F., Biemans, H., Hoff, H., and Kabat, P.: Accounting for environmental flow requirements in global water assessments, *Hydrology and earth system sciences*, 18, 5041–5059, 2014.

Sarremejane, R., England, J., Sefton, C. E., Parry, S., Eastman, M., and Stubbington, R.: Local and regional drivers influence how aquatic community diversity, resistance and resilience vary in response to drying, *Oikos*, 129(12), 1877–1890, 2020.

Smakhtin, V., Revenga, C., and Döll, P.: A pilot global assessment of environmental water requirements and scarcity, *Water international*, 29 (3), 307–317, 2004.

Su, G., Logez, M., Xu, J., Tao, S., Villéger, S., and Brosse, S.: Human impacts on global freshwater fish biodiversity, *Science*, 371, 835–838, 2021.

Tedesco, P. A., Beauchard, O., Bigorne, R., Blanchet, S., Buisson, L., Conti, L., Cornu, J.-F., Dias, M. S., Grenouillet, G., and Hugueny, B.: A global database on freshwater fish species occurrence in drainage basins, *Scientific data*, 4, 1–6, 2017.

Tennant, D. L.: Instream flow regimens for fish, wildlife, recreation and related environmental resources, *Fisheries*, 1, 6–10, 1976.

Tessmann, S. A.: Environmental use sector: reconnaissance elements of the western Dakotas region of South Dakota study, Water Resources Institute, South Dakota State University, 1979.

Virkki, V., Alanära, E., Porkka, M., Ahopelto, L., Gleeson, T., Mohan, C., Wang-Erlandsson, L., Flörke, M., Gerten, D., Gosling, S.N. and Hanasaki, N.: Environmental flow envelopes: quantifying global, ecosystem–threatening streamflow alterations, *Hydrology and Earth System Sciences*, 1–31,

Zeiringer, B., Seliger, C., Greimel, F., and Schmutz, S.: River hydrology, flow alteration, and environmental flow, in: *Riverine ecosystem management*, Springer, Cham, 67–89, 2018.
